# Supplementary material for: Evolution of bacterial consortia in an integrated tannery wastewater treatment process
Source: Royal Society of Chemistry journal article supplement (doi:10.1039/c6ra19603a), 2016-01-01
Supplement: c6ra19603a1.pdf [file c6ra19603a1.pdf]

**Supplementary data**

**Evolution of bacterial consortia in an integrated tannery wastewater treatment  
process**

Hebin Liang, Dongdong Ye, Pan Li, Tingting Su, Jiegen Wu, Lixin Luo\*

School of Bioscience and Bioengineering, South China University of Technology,  
Guangzhou, 510006, China

\* Corresponding author: Tel: +86-20-39380628; fax: +86-20-39380601

E-mail address: btlxluo@scut.edu.cn (Lixin Luo).

## Summary

**Figure S1** Phylogenetic tree of bacterial communities based on the partial 16S gene sequences recovered from the DGGE gel. The scale bar represents evolutionary distance (10 substitutions per 100 nucleotides).

**Figure S2** Rarefaction curves at the 3% distance cutoff indicating the observed number of operational taxonomic units (OTUs) within samples.

**Figure S3** Heatmap describing the 35 most abundant genera of bacterial community for each sample. The relative abundance are indicated by color intensity with the legend at the top right corner.

**Table S1** Species richness and diversity indices based on the  $OTU_{0.03}$  obtained from HiSeq sequencing data.

**Table S2** SRCCs between the microbial composition and environmental parameters (SRCC: Spearman's rank correlation coefficient; RE: removal efficiency; \* indicate  $p < 0.05$ , two tailed, SRCC values with  $p < 0.05$  are shown in red).

**Figure S1** Phylogenetic tree of bacterial communities based on the partial 16S gene sequences recovered from the DGGE gel. The scale bar represents evolutionary distance (10 substitutions per 100 nucleotides).

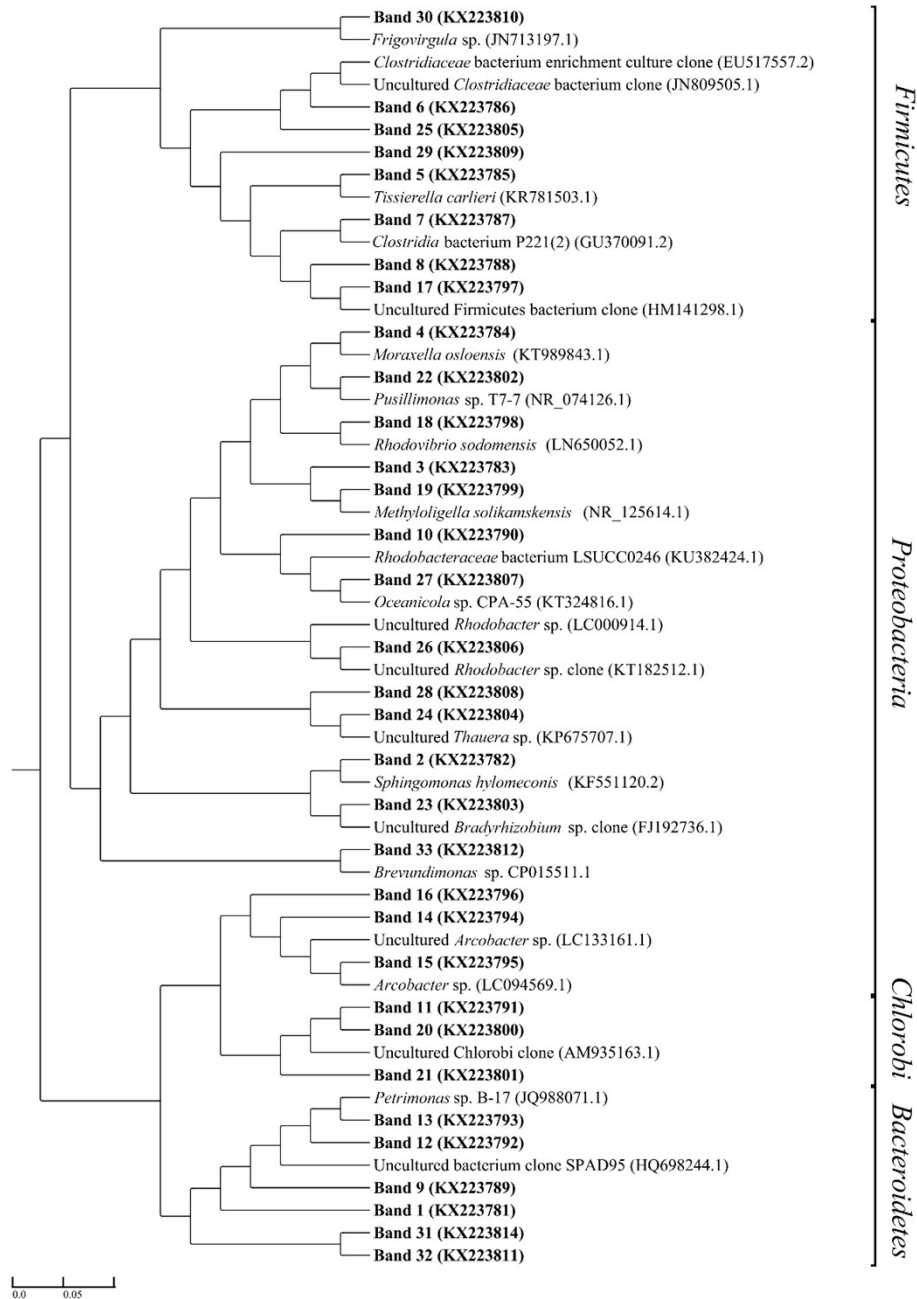

**Figure S2** Rarefaction curves at the 3% distance cutoff indicating the observed number of operational taxonomic units (OTUs) within samples.

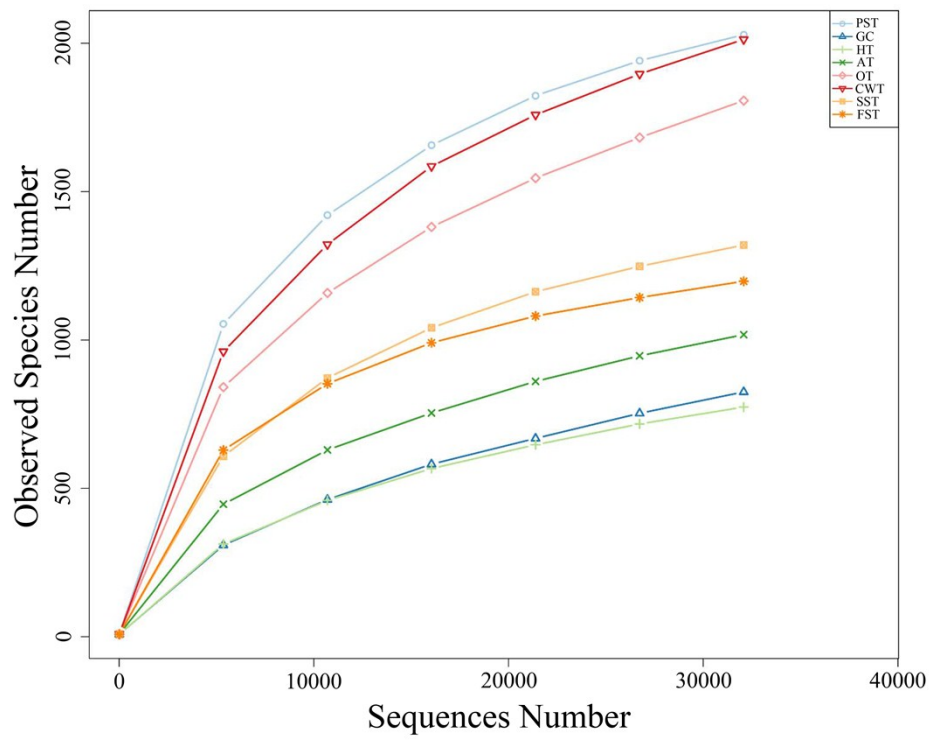



**Table S1** Species richness and diversity indices based on the OTU<sub>0.03</sub> obtained from HiSeq sequencing data.

| Sample | Raw Tags | Effective Tags | OTUs | Shannon | Simpson | Chao1    | ACE      | Goods coverage |
|--------|----------|----------------|------|---------|---------|----------|----------|----------------|
| GC     | 65916    | 64655          | 1097 | 5.22    | 0.928   | 1335.907 | 1433.658 | 0.988          |
| HT     | 52020    | 51176          | 995  | 4.782   | 0.897   | 1101.925 | 1131.541 | 0.99           |
| PST    | 53326    | 50897          | 2295 | 8.572   | 0.99    | 2238.338 | 2356.215 | 0.986          |
| AT     | 58819    | 56168          | 1315 | 6.212   | 0.963   | 1405.005 | 1487.069 | 0.988          |
| SST    | 47129    | 44267          | 1589 | 6.67    | 0.968   | 1568.236 | 1637.057 | 0.988          |
| OT     | 34644    | 33770          | 1807 | 7.663   | 0.981   | 3994.778 | 2712.138 | 0.978          |
| FST    | 39771    | 37047          | 1426 | 6.494   | 0.929   | 1338.695 | 1366.364 | 0.992          |
| CWT    | 60439    | 58890          | 2361 | 8.057   | 0.978   | 2578.047 | 2594.131 | 0.981          |

**Table S2** SRCCs between the microbial composition and environmental parameters

(SRCC: Spearman's rank correlation coefficient; RE: removal efficiency; \* indicate p<0.05, two tailed, SRCC values with p<0.05 are shown in red).

|                         |          | COD     | NH <sub>4</sub> <sup>+</sup> -N | pH     | COD<br>RE (%) | NH <sub>4</sub> <sup>+</sup> -N<br>RE (%) |
|-------------------------|----------|---------|---------------------------------|--------|---------------|-------------------------------------------|
| <i>Proteobacteria</i>   | SRCC     | 0.000   | 0.048                           | -0.238 | 0.321         | -0.179                                    |
|                         | p values | 1.000   | 0.911                           | 0.570  | 0.482         | 0.702                                     |
| <i>Bacteroidetes</i>    | SRCC     | 0.619   | 0.762*                          | -0.381 | 0.143         | -0.750                                    |
|                         | p values | 0.102   | 0.028                           | 0.352  | 0.760         | 0.052                                     |
| <i>Firmicutes</i>       | SRCC     | 0.381   | -0.286                          | 0.643  | -0.429        | 0.286                                     |
|                         | p values | 0.352   | 0.493                           | 0.086  | 0.337         | 0.535                                     |
| <i>Others</i>           | SRCC     | -0.810* | -0.667                          | 0.071  | -0.143        | 0.679                                     |
|                         | p values | 0.015   | 0.071                           | 0.867  | 0.760         | 0.094                                     |
| <i>Actinobacteria</i>   | SRCC     | -0.548  | -0.071                          | -0.310 | 0.714         | 0.107                                     |
|                         | p values | 0.160   | 0.867                           | 0.456  | 0.071         | 0.819                                     |
| <i>Chloroflexi</i>      | SRCC     | -0.643  | -0.357                          | -0.333 | 0.429         | 0.214                                     |
|                         | p values | 0.086   | 0.385                           | 0.420  | 0.337         | 0.645                                     |
| <i>[Thermi]</i>         | SRCC     | -0.714* | -0.381                          | 0.190  | 0.250         | 0.786*                                    |
|                         | p values | 0.047   | 0.352                           | 0.651  | 0.589         | 0.036                                     |
| <i>Planctomycetes</i>   | SRCC     | -0.571  | -0.333                          | -0.143 | 0.000         | 0.286                                     |
|                         | p values | 0.139   | 0.420                           | 0.736  | 1.000         | 0.535                                     |
| <i>Acidobacteria</i>    | SRCC     | -0.643  | -0.167                          | -0.595 | 0.464         | 0.000                                     |
|                         | p values | 0.086   | 0.693                           | 0.120  | 0.294         | 1.000                                     |
| <i>TM7</i>              | SRCC     | -0.500  | 0.357                           | -0.429 | 0.321         | -0.214                                    |
|                         | p values | 0.207   | 0.385                           | 0.289  | 0.482         | 0.645                                     |
| <i>Gemmatimonadetes</i> | SRCC     | -0.643  | -0.310                          | -0.357 | 0.071         | 0.179                                     |
|                         | p values | 0.086   | 0.456                           | 0.385  | 0.879         | 0.702                                     |
| <i>Nitrospirae</i>      | SRCC     | -0.524  | -0.286                          | -0.381 | 0.036         | 0.000                                     |
|                         | p values | 0.183   | 0.493                           | 0.352  | 0.939         | 1.000                                     |
| <i>Tenericutes</i>      | SRCC     | 0.405   | 0.500                           | -0.119 | 0.143         | -0.357                                    |
|                         | p values | 0.320   | 0.207                           | 0.779  | 0.760         | 0.432                                     |
| <i>OD1</i>              | SRCC     | -0.323  | 0.156                           | -0.216 | 0.198         | -0.108                                    |
|                         | p values | 0.435   | 0.713                           | 0.608  | 0.670         | 0.818                                     |
| <i>Spirochaetes</i>     | SRCC     | 0.452   | -0.214                          | 0.262  | -0.464        | -0.107                                    |
|                         | p values | 0.260   | 0.610                           | 0.531  | 0.294         | 0.819                                     |
